# Supplementary material for: Facile fabrication of nanoporous gold films for surface plasmon resonance (SPR) sensing and SPR-based SERS
Source: Royal Society of Chemistry journal article supplement (doi:10.1039/d1tc01046h), 2021-01-01
Supplement: d1tc01046h1.pdf [file d1tc01046h1.pdf]

## Electronic Supplementary Material (ESI) for Journal of Materials Chemistry C.

This journal is ©The Royal Society of Chemistry 2021

Supporting information for:

Facile Fabrication of Nanoporous Gold Films for Surface Plasmon Resonance (SPR) Sensing and SPR-based SERS

Chen Chen <sup>a,c</sup>, Ziwei Liu <sup>a,b</sup>, Chen Cai <sup>a,b</sup> and Zhi-mei Qi <sup>a,b,\*</sup>

<sup>a</sup>State Key Laboratory of Transducer Technology, Aerospace Information Research Institute, Chinese Academy of Sciences, Beijing 100190, P. R. China.

<sup>b</sup>University of Chinese Academy of Sciences, Beijing 100049, China.

<sup>c</sup>Department of Physics, Nanjing Tech University, Nanjing 211816, China.

\* E-mail: zhimei-qi@mail.ie.ac.cn

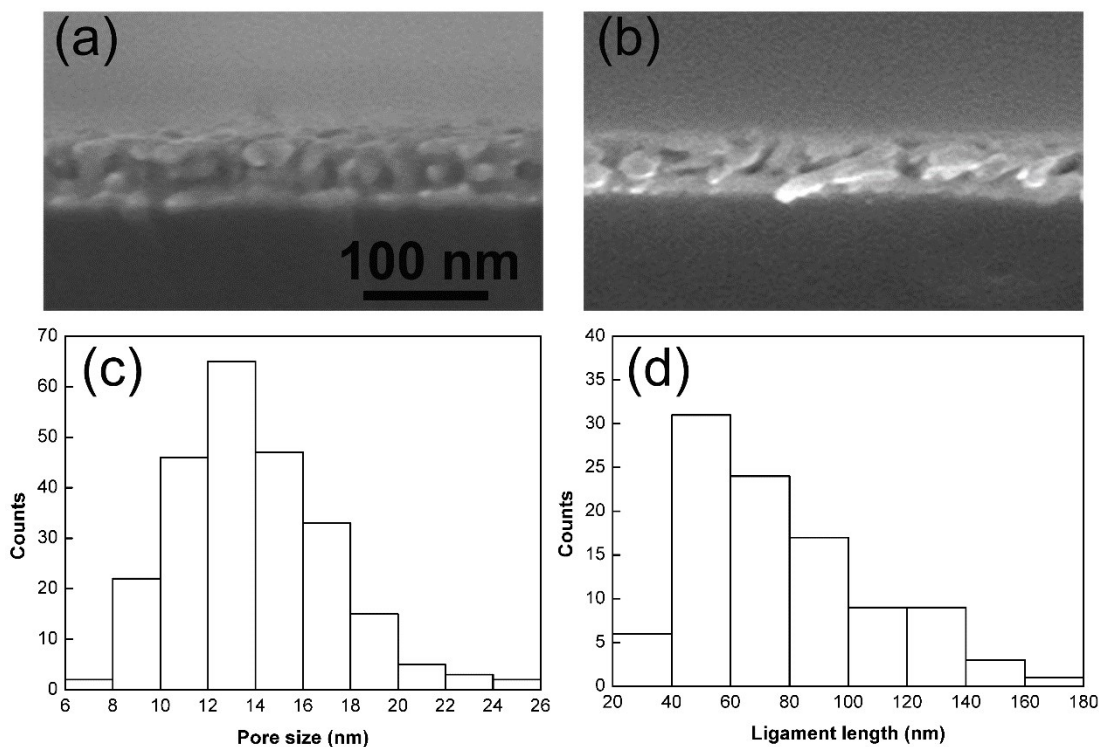

**Fig. S1** Cross-sectional SEM micrographs of NPG films with different dealloying parameters: (a) -18 °C for 24 h and (b) 20 °C for 1 h. (c) The pore size distribution of NPG films prepared at -18 °C. (d) The ligament length distribution of NPG films prepared at 20 °C.

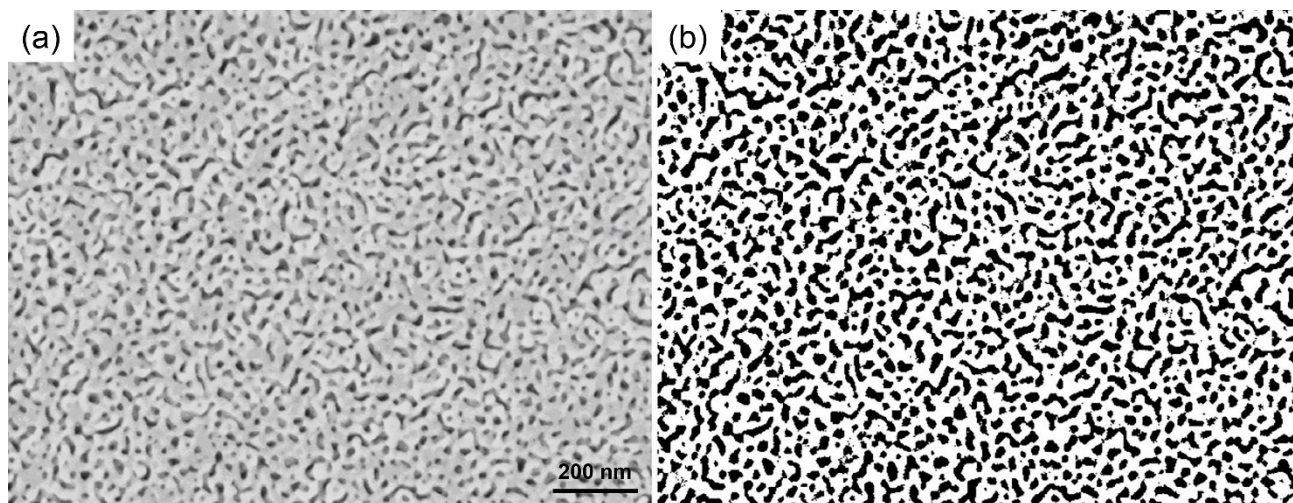

**Fig. S2** (a) The raw and (b) the binarized SEM images of NPG film prepared by low-temperature dealloying.
